# Supplementary material for: Three-Dimensional Digital Visualization System Assisted Vitrectomy for Infectious Endophthalmitis
Source: Research Square preprint supplement (doi:10.21203/rs.3.rs-2076616/v1), 2022-11-21
Supplement: Supplementary file 1 [file 8f928090841f10e47d1abd2d.docx]

Table 1. Clinical Characteristics of Patients Who Underwent Three-Dimensional Digital Visualization System Assisted Vitrectomy for Infectious Endophthalmitis

| N. | age | gender | causes for endophthalmitis | time to vitrecomy  (days) | pre-op intravitreal antibiotics | post-op antibiotics (days) | illuminaton | operation duration  (minutes) | organism | tamponade | follow-up (months) | pre-op BCVA | | final BCVA | |
| --- | --- | --- | --- | --- | --- | --- | --- | --- | --- | --- | --- | --- | --- | --- | --- |
| decimal | LogMAR | decimal | LogMAR |
| 1 | 58 | M | endogenous | 20 | / | 14 | 25% | 120 | klebsiella pneumoniae | silicone oil | 6 | LP | 2.7 | LP | 2.7 |
| 2 | 29 | M | trauma | <1 | / | 4 | 25% | 70 | / | filtrated air | 5 | 0.12 | 0.92 | 0.25 | 0.60 |
| 3 | 33 | M | trauma | <1 | / | 7 | 25% | 95 | / | filtrated air | 5 | HM | 2.4 | 0.5 | 0.30 |
| 4 | 47 | M | trauma | 10 | vancomycin | 1 | 25% | 55 | / | PBS | 5 | HM | 2.4 | 0.5 | 0.30 |
| 5 | 44 | M | trauma | 1 | vancomycin | 3 | 25% | 60 | / | PBS | 4 | 0.02 | 1.70 | 0.3 | 0.52 |
| 6 | 50 | M | trauma | 9 | vancomycin | 5 | 30% | 120 | G+ bacterial | silicone oil | 14 | LP | 2.7 | HM | 2.4 |
| 7 | 51 | M | trauma | 8 | vancomycin | 6 | 30% | 105 | / | silicone oil | 5 | HM | 2.4 | CF | 2.1 |
| 8 | 45 | M | trauma | 2 | vancomycin | 1 | 25% | 55 | / | PBS | 4 | 0.12 | 0.92 | 0.6 | 0.22 |
| 9 | 69 | M | trauma | 4 | vancomycin/cefotaxime sodium | 4 | 30% | 50 | G+ bacterial | PBS | 5 | HM | 2.4 | 0.12 | 0.92 |
| 10 | 47 | M | trauma | 4 | vancomycin/cefotaxime sodium | 8 | 30% | 80 | staphylococcus epidermidis | silicone oil | 5 | FC | 2.1 | 0.04 | 1.40 |
| 11 | 68 | F | post-phaco | 1 | vancomycin/cefotaxime sodium | 21 | 25% | 80 | enterococcus faecalis | silicone oil | 2 | LP | 2.7 | CF | 2.1 |

Abbreviations: M, male; F, female; phaco, phacoemulsification; pre-op, preopteration; post-op, postoperation; G+, gram-positive; PBS, phosphate buffer solution; BCVA, best-corrected visual acuity; LP, light perception; HM, hand movement; CF, counting fingers.
